# Supplementary material for: Coenzyme Q10 Prevents Senescence and Dysfunction Caused by Oxidative Stress in Vascular Endothelial Cells
Source: Hindawi journal article supplement (doi:10.1155/2018/3181759), 2018-01-01
Supplement: f1 [file 3181759.f1.pdf]

## **Coenzyme Q10 prevents senescence and dysfunction caused by oxidative stress in vascular endothelial cells.**

**Manuscript ID: 3181759.v2**

### **Supplemental Information**

#### **Expanded Materials and Methods**

##### **Effects of H<sub>2</sub>O<sub>2</sub>, CoQ<sub>10</sub>H<sub>2</sub> and oxCoQ<sub>10</sub> treatments on HUVECs**

HUVECs were incubated for 24 hours in medium containing different concentrations of CoQ<sub>10</sub>H<sub>2</sub> or oxCoQ<sub>10</sub> (0 - 30  $\mu$ M) or with 10  $\mu$ M CoQ<sub>10</sub>H<sub>2</sub> or oxCoQ<sub>10</sub> for different time periods (0 - 48 hours). HUVECs were also treated with different concentrations of H<sub>2</sub>O<sub>2</sub> (0 - 100  $\mu$ M) for 1 hour. Total RNA was then extracted from the cells and subjected to reverse transcription with random primers. RT-PCR analysis was then performed.

##### **Cell viability analysis**

Cell viability was assessed using the 3-(4,5-dimethylthiazol-2-yl)-2,5-diphenyltetrazolium bromide (MTT) assay. In brief, cells were seeded in 96-well flat-bottomed plates and incubated for 24 hours in medium with or without 10  $\mu$ M CoQ<sub>10</sub>H<sub>2</sub>. The medium was then removed and the HUVECs were washed twice with phosphate-buffered saline (PBS) before H<sub>2</sub>O<sub>2</sub> stimulation. At each time point (0 - 48 hours), the culture medium was replaced with fresh medium containing 0.5 mg/ml MTT, and cells were incubated in a CO<sub>2</sub> incubator at 37 °C for 4 hours. Absorbance at 570 nm was measured using a plate reader.

##### **Cell proliferation analysis**

In brief, treated HUVECs ( $1 \times 10^5$  cells/well) were harvested and seeded into 12-well plates and incubated for 48 hours at 37 °C. To examine cell proliferation the wells

were then imaged with an inverted microscope (Life Technologies). Cell counts were made for 3 independent images from randomly selected wells.

#### **Migration assay by pre-stimulated H<sub>2</sub>O<sub>2</sub>**

The pre-stimulated by H<sub>2</sub>O<sub>2</sub> experimental group: (1) control group: untreated HUVECs; (2) CoQ<sub>10</sub>H<sub>2</sub> group: cultured HUVECs incubated with 10 µM CoQ<sub>10</sub>H<sub>2</sub> for 24 hours; (3) H<sub>2</sub>O<sub>2</sub> group: cultured HUVECs incubated with 100 µM H<sub>2</sub>O<sub>2</sub> alone for 12 hours or 3 hours; (4) Treated group: cultured HUVECs pre-stimulated with 100 µM H<sub>2</sub>O<sub>2</sub> for 12 hours or 3 hours and then incubated with 10 µM CoQ<sub>10</sub>H<sub>2</sub> for 24 hours. To evaluate cell migration, scratch assays were performed wherein confluent, treated HUVECs in 12-well plates were scratched with 200 µl pipette tips. At 0 hour and 12 hours after scratching, images were taken using an inverted microscope to assess cell migration into the wound area. The ratio of wound closure was calculated by measuring each image with Image J.

#### **Assay of migration and tube formation following H<sub>2</sub>O<sub>2</sub> treatment**

The experimental group: (1) control group: untreated HUVECs; (2) CoQ<sub>10</sub>H<sub>2</sub> group: cultured HUVECs incubated for 24 hours in medium with 10 µM CoQ<sub>10</sub>H<sub>2</sub> and then cultured for an additional 12 hours in medium lacking CoQ<sub>10</sub>H<sub>2</sub>; (3) H<sub>2</sub>O<sub>2</sub> group: HUVECs cultured for 24 hours in medium without CoQ<sub>10</sub>H<sub>2</sub> and cultured for another 12 hours in medium containing 60 µM H<sub>2</sub>O<sub>2</sub> and lacking CoQ<sub>10</sub>H<sub>2</sub>; (4) CoQ<sub>10</sub>H<sub>2</sub> + H<sub>2</sub>O<sub>2</sub> group: HUVECs cultured for 24 hours in medium with 10 µM CoQ<sub>10</sub>H<sub>2</sub> for 24 hours and then cultured for 12 hours in medium with 60 µM H<sub>2</sub>O<sub>2</sub> and lacking CoQ<sub>10</sub>H<sub>2</sub>. The ratio of wound closure and quantification of tubes was calculated for each image with Image J.

#### **Analysis of the H<sub>2</sub>O<sub>2</sub>-induced changes in CoQ<sub>10</sub>H<sub>2</sub> and oxCoQ<sub>10</sub> concentration and expression of genes involved in CoQ<sub>10</sub> biosynthesis**

In brief, cells were seeded in culture flasks and incubated until HUVECs reached

90% confluence. The medium was then removed and the HUVECs were washed twice with PBS and then treated with 100  $\mu$ M H<sub>2</sub>O<sub>2</sub>. At each time point (0 - 24 hours), cellular CoQ<sub>10</sub>H<sub>2</sub> and oxCoQ<sub>10</sub> levels were determined using a LC/MS/MS method described by Ruiz-Jiménez et al. The mRNA expression of *PDSS2* and *COQ2*, which are both involved in CoQ<sub>10</sub> biosynthesis, in the 0 and 12 hours group was detected in HUVECs using real-time PCR.

#### **Cell number and cell protein concentration assay**

HUVECs were first trypsinized after treatment with 0 or 100  $\mu$ M H<sub>2</sub>O<sub>2</sub> for 12 hours. To assess cell numbers, cells resuspended in growth medium were diluted 1:1 with 0.4% trypan blue stain from Gibco™ (Invitrogen Corporation, USA). Stained and unstained cells were counted using a Luna™ Automated Cell Counter (Logos Biosystems, USA). To assess protein content, whole-cell extracts after were prepared from H<sub>2</sub>O<sub>2</sub>-treated HUVECs lysed at 4 °C in cell lysis buffer (Cell Signaling Technology, MA) supplemented with protease inhibitors (Sigma Aldrich, MO). Protein samples were centrifuged at 15,000 g for 10 minutes and the supernatants were collected for determination of protein concentrations using the BCA protein Assay Kit (Thermo Fisher Scientific, CO).

## Supplemental Tables and Figure Legends

**Table S1. Primer sequences for Real-time RT-PCR**

| Gene                       | Forward (5' - 3')          | Reverse (5' - 3')         |
|----------------------------|----------------------------|---------------------------|
| <i>SIRT1</i>               | GCGGGAATCCAAAGGATAAT       | GCACCTAGGACATCGAGGAA      |
| <i>SIRT3</i>               | GTCGGGCATCCCTGCCTCAAAGC    | GGAACCCTGTCTGCCATCACGTCAG |
| <i>SOD2</i>                | GCAGAAGCACAGCCTCCCCG       | CCTTGGCCAACGCCTCCTGG      |
| <i>PGC-α</i>               | GTGAAGACCAGCCTCTTTGC       | TCACGTCTCCATCTGTCAGC      |
| <i>PAI-1</i>               | AGCTCCTTGTACAGATGCCG       | ACAACAGGAGGAGAAACCCA      |
| <i>eNOS</i>                | GAAACGGTCGCTTCGACGT        | ATCCCACCCAGTCAATCCCT      |
| <i>iNOS</i>                | CCTGAGCTCTTCGAAATCCCA      | CCCGAAACCACTCGTATTTGG     |
| <i>P16<sup>INK4a</sup></i> | AGCCTTCGGCTGACTGGCTGG      | CTGCCCATCATCATGACCTGGA    |
| <i>P21</i>                 | ATGTCCGTCAGAACCCATG        | CAGTGGTGTCTCGGTGAC        |
| <i>P53</i>                 | CTCCTCTCCCCAGCCAAAGA       | GGAACATCTCGAAGCGCTCA      |
| <i>P14<sup>arf</sup></i>   | GTGGCCCTCGTGCTGATG         | AGCACCACCAGCGTGTCC        |
| <i>BCL2</i>                | CTTTGAGTTCGGTGGGGTCA       | GGGCCGTACAGTTCCACAAA      |
| <i>BAX</i>                 | CCGCCGTGGACACAGAC          | CAGAAAACATGTCAGCTGCCA     |
| <i>IL-1α</i>               | GTCTCTGAATCAGAAATCCTTCTATC | CATGTCAAATTTCACTGCTTCATCC |
| <i>IL-1β</i>               | GGATATGGAGCAACAAGTGG       | ATGTACCAGTTGGGGAACTG      |
| <i>IL-6</i>                | GCCTTCGGTCCAGTTGCCTT       | AGTGCCTCTTTGCTGCTTTCAC    |
| <i>TNF-α</i>               | CGGGACGTGGAGCTGGCCGAGGAG   | CACCAGCTGGTTATCTCTCAGCTC  |
| <i>MMP-1</i>               | GGGGCTTTGATGTACCCTAGC      | TGTCACACGCTTTTGGGGTTT     |
| <i>MMP-3</i>               | CGGTTCCGCCTGTCTCAAG        | CGCCAAAAGTGCCTGTCTT       |
| <i>MMP-13</i>              | GGACAAGTAGTTCCAAAGGCTACAA  | CTTTTGCCGGTGTAGGTGTAGATAG |
| <i>PDSS2</i>               | GAATCAGGTAGTGTGTCAGAGG     | GAGGCTATTCCAGCTGTCATG     |
| <i>COQ2</i>                | TATGATACTATTTATGCCCA       | GCTCAGTGCCCCCAGCATTG      |
| <i>β-Actin</i>             | TGGCACCCAGCACAAATGAA       | CTAAGTCATAGTCCGCCTAGAAGCA |

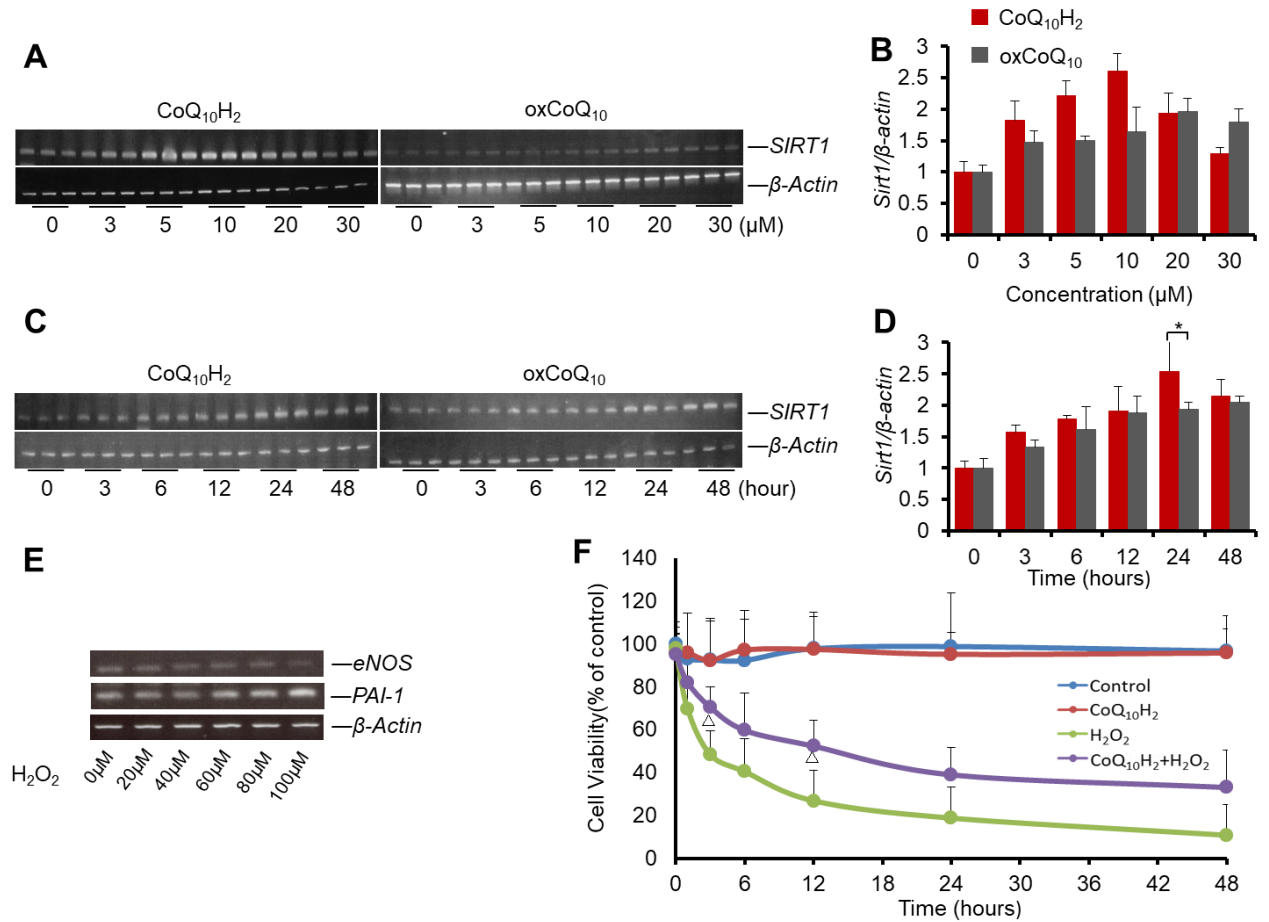

**Figure S1.  $\text{H}_2\text{O}_2$ ,  $\text{CoQ}_{10}\text{H}_2$  and  $\text{oxCoQ}_{10}$  affect HUVEC-related gene expression and  $\text{CoQ}_{10}\text{H}_2$  prevents  $\text{H}_2\text{O}_2$ -mediated decreases in cell viability.**

(A-D) HUVECs were treated with different concentrations of  $\text{CoQ}_{10}\text{H}_2$  or  $\text{oxCoQ}_{10}$  for different time periods. The expression level of *SIRT1* mRNA was measured by RT-PCR (n=3). \* $p < 0.05$ ; mean  $\pm$  SD, Student's t-test.

(E) *eNOS* and *PAI-1* expression in  $\text{H}_2\text{O}_2$ -treated HUVECs were determined by RT-PCR. (F) Cell viability in each group of HUVECs was determined by MTT (n=4).

$\Delta p < 0.05$  vs.  $\text{H}_2\text{O}_2$  group; mean  $\pm$  SD, one-way ANOVA followed by Tukey's test.

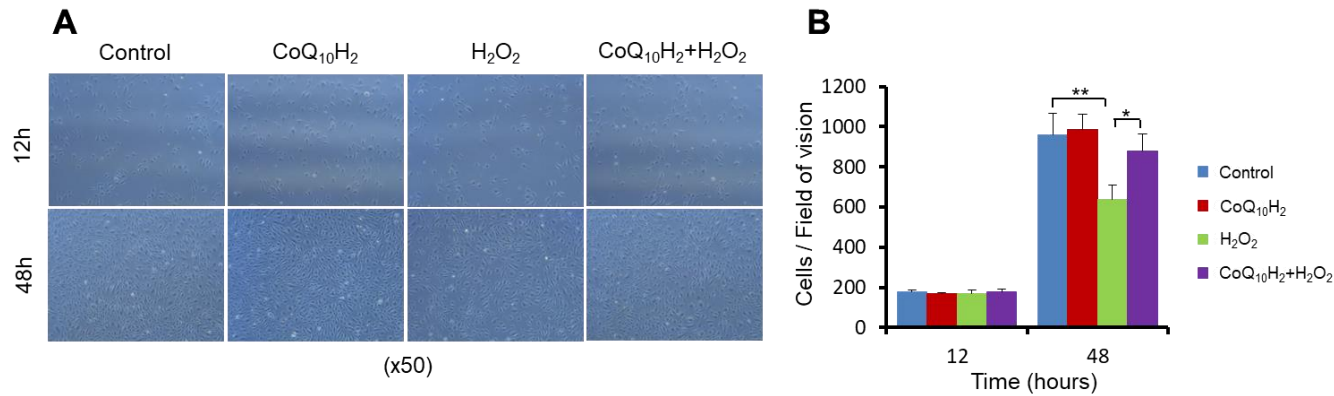

**Figure S2. Preincubation with CoQ<sub>10</sub>H<sub>2</sub> prevented H<sub>2</sub>O<sub>2</sub>-induced reduction of cell proliferation in HUVECs.**

(A) Representative images of cells from each group (Control, CoQ<sub>10</sub>H<sub>2</sub>, H<sub>2</sub>O<sub>2</sub> and CoQ<sub>10</sub>H<sub>2</sub> + H<sub>2</sub>O<sub>2</sub>) at 12 or 48 hours. (B) Histograms show changes in the average number of cells in each group per field of vision after 12 and 48 hours (n=3). \*p < 0.05, \*\*p < 0.01; one-way ANOVA followed by Tukey's test.

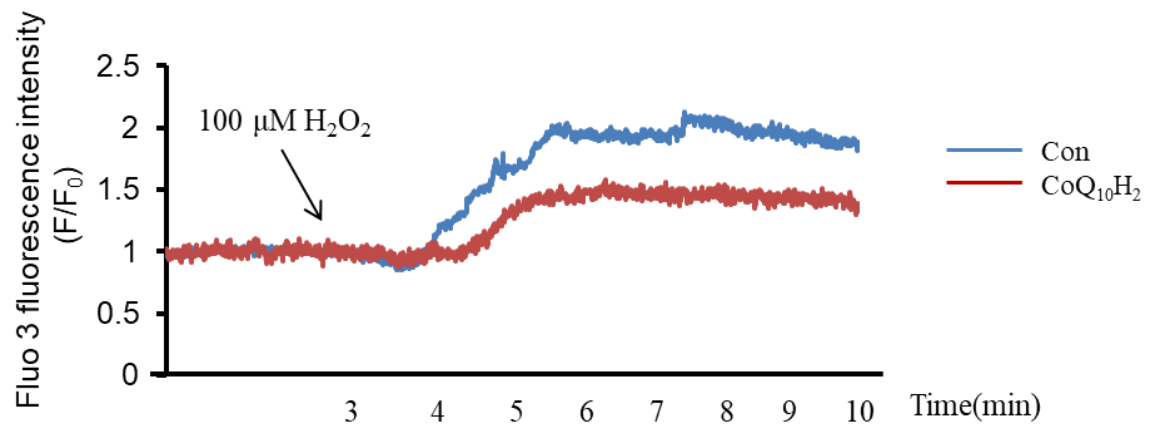

**Figure S3. CoQ<sub>10</sub>H<sub>2</sub> blocks H<sub>2</sub>O<sub>2</sub>-induced increases in free cytosolic Ca<sup>2+</sup> levels in endothelial cells.**

HUVECs were incubated for 24 hours with vehicle or 10 μM CoQ<sub>10</sub>H<sub>2</sub> and treated with 100 μM H<sub>2</sub>O<sub>2</sub>. Ca<sup>2+</sup> levels were determined by fluorescence microscopy using the probe Fluo-3-AM (n = 6).

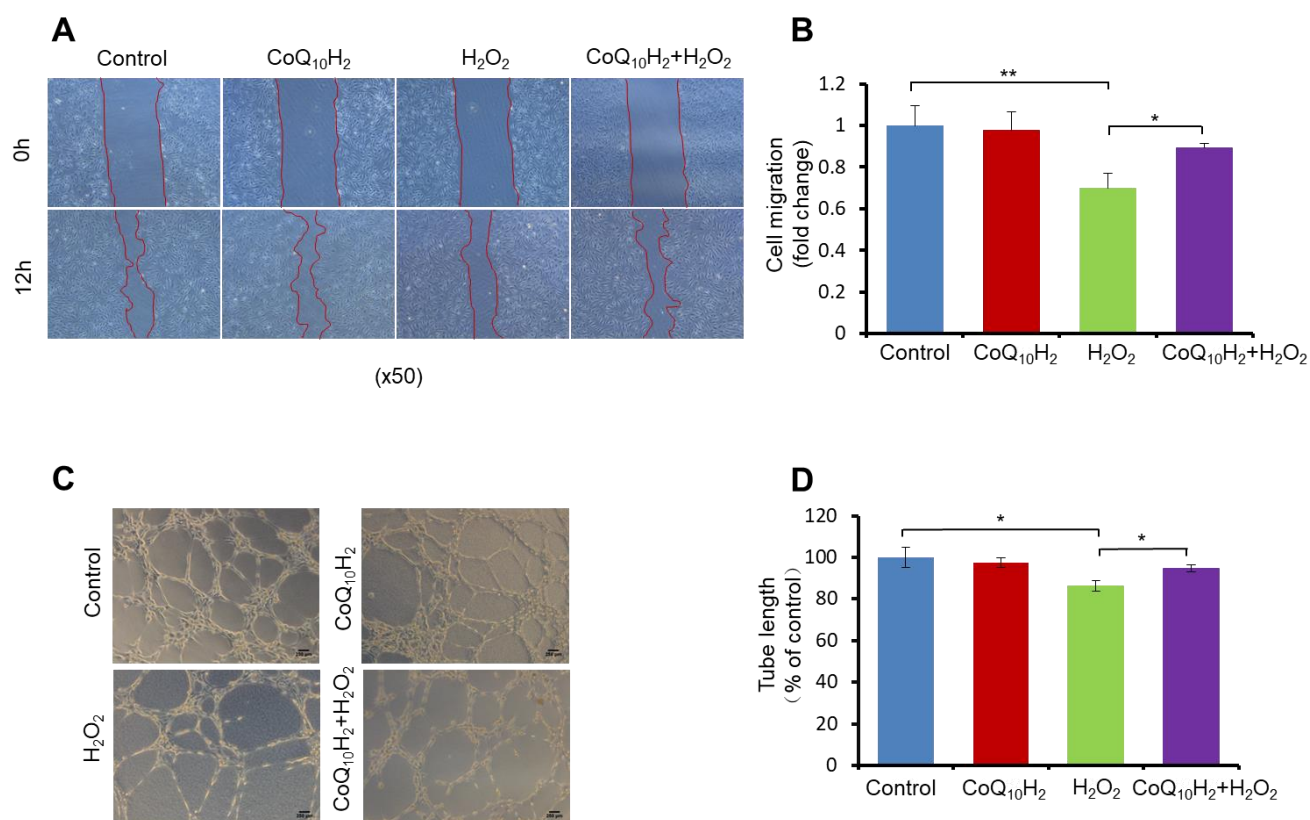

**Figure S4. CoQ<sub>10</sub>H<sub>2</sub> treatment prevented H<sub>2</sub>O<sub>2</sub>-induced reduction in migration and tube formation.**

(A) Representative images of cell migration analysis evaluated using a wound healing assay conducted over 12 hours in 60  $\mu$ M H<sub>2</sub>O<sub>2</sub>-induced reduction of migration. (B) Histograms show fold-change in migration activity relative to control cells (n=3). (C) Representative images from a 60  $\mu$ M H<sub>2</sub>O<sub>2</sub>-induced tube formation assay after a 6 hours incubation. (D) Histograms show fold-change in total cell tube length relative to control cells (n=3). \*p < 0.05, \*\*p < 0.01; mean  $\pm$  SD, one-way ANOVA followed by Tukey's test.



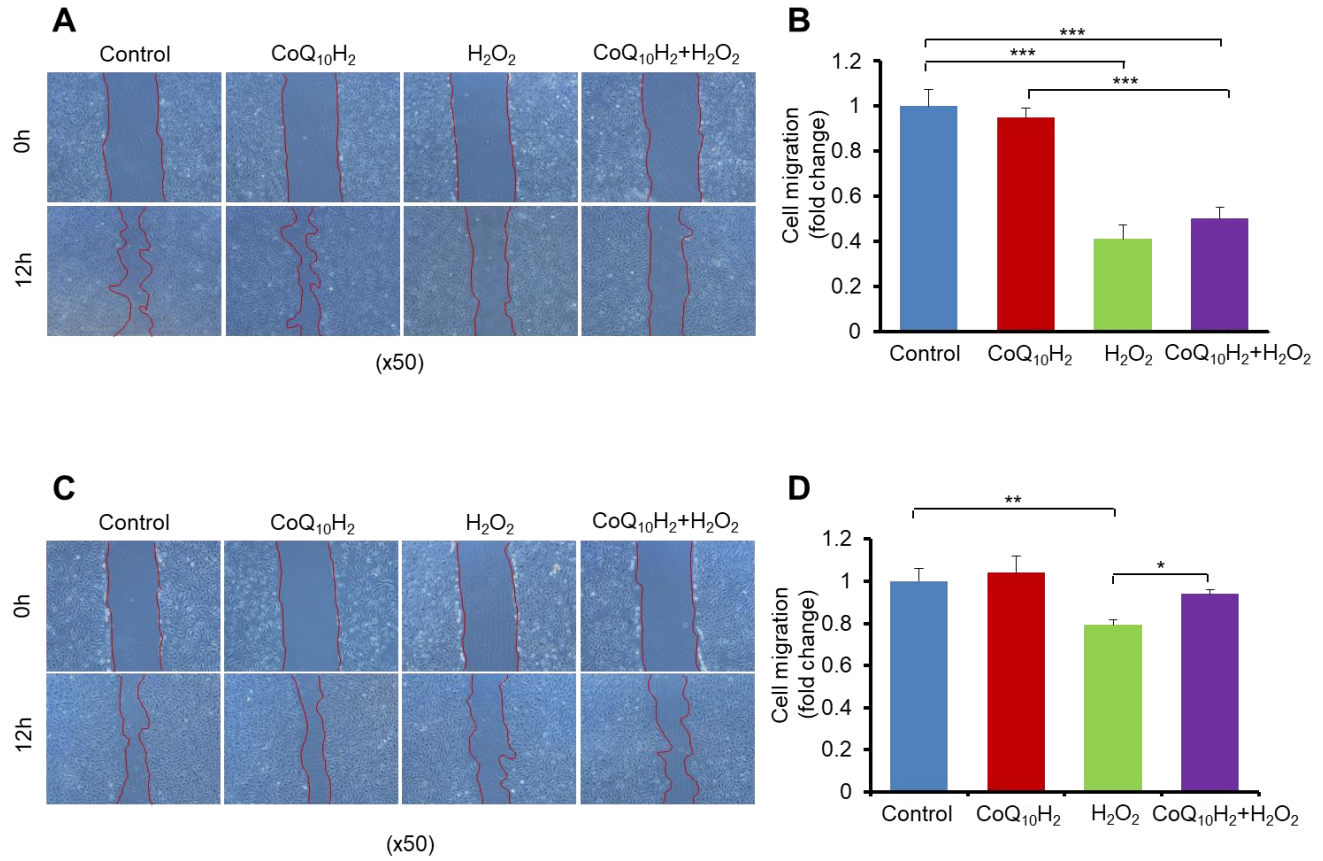

**Figure S5. CoQ<sub>10</sub>H<sub>2</sub> affects H<sub>2</sub>O<sub>2</sub>-dependent reduction in endothelial cell migration.**

(A and B) Cultured HUVECs were pre-stimulated with 100  $\mu$ M H<sub>2</sub>O<sub>2</sub> for 12 hours or (C and D) 3 hours and then incubated with 10  $\mu$ M CoQ<sub>10</sub>H<sub>2</sub> for 24 hours. Cell migration was evaluated by a wound healing assay (n=3). \*p < 0.05, \*\*p < 0.01, \*\*\*p < 0.001; mean  $\pm$  SD.

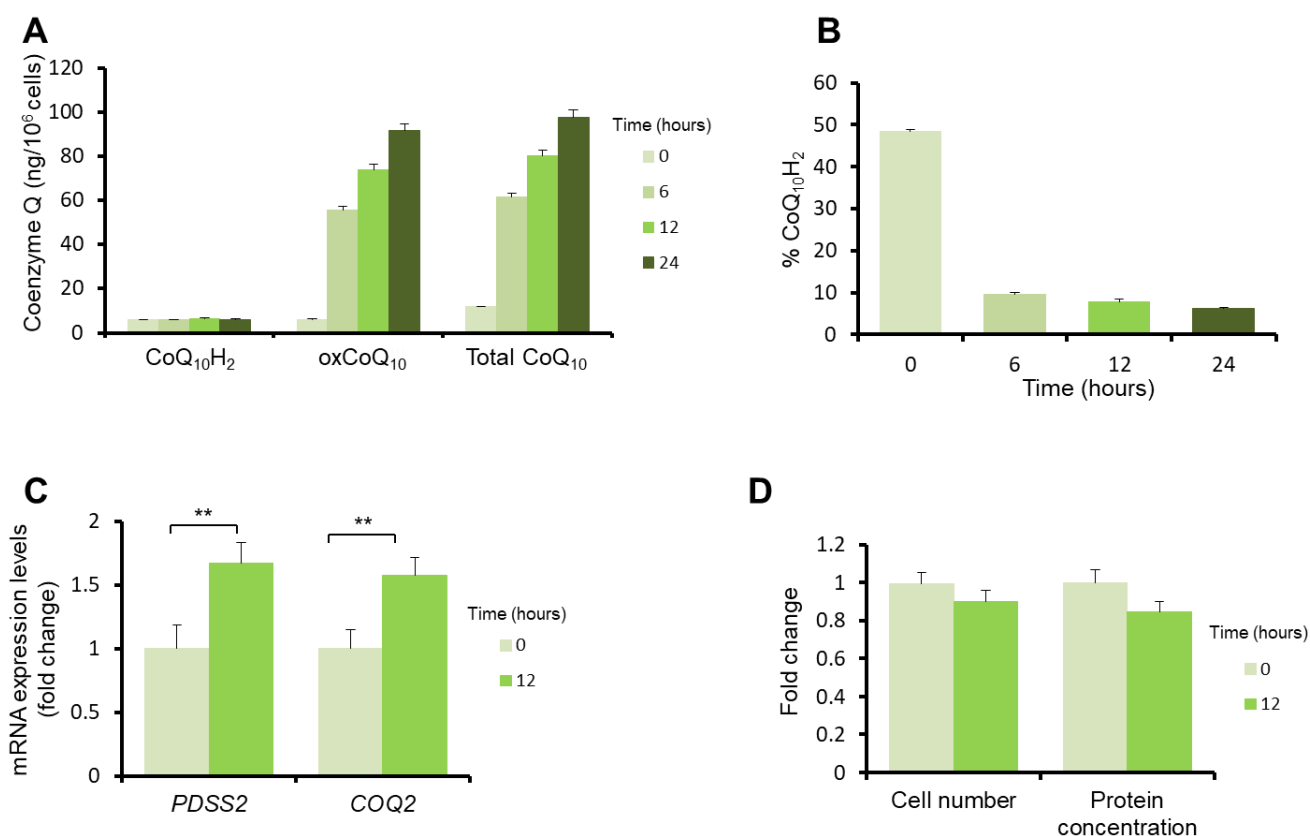

**Figure S6. CoQ<sub>10</sub>H<sub>2</sub> and oxCoQ<sub>10</sub> levels in HUVECs increased after H<sub>2</sub>O<sub>2</sub> treatment.**

(A) Time-dependent increases in oxCoQ<sub>10</sub> levels in HUVECs treated with H<sub>2</sub>O<sub>2</sub>. HUVECs were treated with 100  $\mu$ M H<sub>2</sub>O<sub>2</sub> for 0-24 hours. (B) The percentage of CoQ<sub>10</sub>H<sub>2</sub> in total coenzyme Q10 (Total CoQ<sub>10</sub>) was calculated (n=4). (C) Analysis of *PDSS2* and *COQ2* gene expression. Histograms show fold-change in mRNA level relative to control cells (n=3). \*\*p < 0.01; mean  $\pm$  SD, Student's t-test. (D) Analysis of cell number and protein concentration. Histograms show fold-change in cell number and protein concentration relative to control cells (n=3).
